# Supplementary material
Source: Copernicus journal article supplement (doi:10.5194/gchron-8-313-2026)
Supplement: Supplementary file [file gchron-8-313-2026-supplement-title-page.pdf › gchron-8-313-2026-supplement-title-page.pdf]

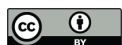

*Supplement of*

## **Response of the Rb–Sr system in biotite during contact metamorphism in the aureole of the Makhavinekh Lake Pluton, Labrador**

**Christopher R. M. McFarlane**

*Correspondence to:* Christopher R. M. McFarlane (crmm@unb.ca)

- gchron-8-313-2026-supplement-title-page.pdf
- Supplement\_data\_MLP\_biotite\_Rb-Sr.xlsx

The copyright of individual parts of the supplement might differ from the article licence.
